# Supplementary material for: Isolation and characterization of a Vibrio owensii phage phi50-12
Source: PubMed Central journal article supplement (PMC9525291; doi:10.1038/s41598-022-20831-2), 2022-09-30
Supplement: 41598_2022_20831_MOESM1_ESM.pdf [file 41598_2022_20831_MOESM1_ESM.pdf]

**Supplementary Table S1: *Vibrio owensii* (GCA\_000829735.1) genome neighbors**

[https://www.ncbi.nlm.nih.gov/genome/neighbors/17721?genome\\_assembly\\_id=218358](https://www.ncbi.nlm.nih.gov/genome/neighbors/17721?genome_assembly_id=218358)

| #Organism/Name                             | Strain              | BioSample           | BioProject                    | Assembly                          | Level                  | Size                      | Scaffolds  | Symmetric Identity | Gapped Identity           |
|--------------------------------------------|---------------------|---------------------|-------------------------------|-----------------------------------|------------------------|---------------------------|------------|--------------------|---------------------------|
| <b>Vibrio owensii</b>                      | <b>OCN002</b>       | <b>SAMD00019142</b> | <b>PRJDB3039</b>              | <b>GCA_00081827</b><br><b>5.1</b> | <b>Contig</b>          | <b>5.8507</b><br><b>9</b> | <b>198</b> | <b>90.0948</b>     | <b>97.024</b><br><b>9</b> |
| <b>Vibrio owensii</b>                      | <b>bablab_jr007</b> | <b>SAMN15545057</b> | <b>PRJNA6465</b><br><b>03</b> | <b>GCA_01646417</b><br><b>5.1</b> | <b>Contig</b>          | <b>5.8545</b><br><b>6</b> | <b>145</b> | <b>89.882</b>      | <b>96.771</b><br><b>6</b> |
| <b>Vibrio owensii</b>                      | <b>00-18-3-1</b>    | <b>SAMN12668384</b> | <b>PRJNA5630</b><br><b>78</b> | <b>GCA_01311424</b><br><b>5.1</b> | <b>Contig</b>          | <b>5.8174</b><br><b>5</b> | <b>55</b>  | <b>89.7277</b>     | <b>97.056</b>             |
| <b>Vibrio owensii</b>                      | <b>XSBZ03</b>       | <b>SAMN05213947</b> | <b>PRJNA3144</b><br><b>25</b> | <b>GCA_00202175</b><br><b>5.1</b> | <b>Complete Genome</b> | <b>5.8902</b>             | <b>-</b>   | <b>89.5139</b>     | <b>97.074</b><br><b>6</b> |
| <b>Vibrio owensii</b>                      | <b>BR345</b>        | <b>SAMN11039182</b> | <b>PRJNA5249</b><br><b>72</b> | <b>GCA_00434932</b><br><b>5.1</b> | <b>Contig</b>          | <b>5.8124</b><br><b>2</b> | <b>38</b>  | <b>89.3944</b>     | <b>97.047</b><br><b>4</b> |
| <b>Vibrio owensii</b>                      | <b>bablab_jr005</b> | <b>SAMN15545055</b> | <b>PRJNA6465</b><br><b>03</b> | <b>GCA_01646419</b><br><b>5.1</b> | <b>Contig</b>          | <b>5.8597</b>             | <b>142</b> | <b>89.3292</b>     | <b>96.748</b><br><b>2</b> |
| <b>Vibrio owensii</b>                      | <b>NCCB 76037</b>   | <b>SAMN04279320</b> | <b>PRJNA3027</b><br><b>18</b> | <b>GCA_00155796</b><br><b>5.1</b> | <b>Contig</b>          | <b>5.8089</b><br><b>3</b> | <b>54</b>  | <b>88.3445</b>     | <b>96.973</b><br><b>1</b> |
| <b>Vibrio owensii</b><br><b>ATCC 25919</b> | <b>ATCC 25919</b>   | <b>SAMD00036653</b> | <b>PRJDB720</b>               | <b>GCA_00040022</b><br><b>5.1</b> | <b>Scaffold</b>        | <b>5.8045</b><br><b>2</b> | <b>174</b> | <b>88.3036</b>     | <b>96.974</b><br><b>8</b> |
| <b>Vibrio owensii</b>                      | <b>NCTC11318</b>    | <b>SAMEA1041671</b> | <b>PRJEB6403</b>              | <b>GCA_90046039</b>               | <b>Contig</b>          | <b>5.8642</b>             | <b>7</b>   | <b>88.0961</b>     | <b>96.978</b>             |

|                                 |                     |                     |                    |                        |                        |                |            |                |                |
|---------------------------------|---------------------|---------------------|--------------------|------------------------|------------------------|----------------|------------|----------------|----------------|
|                                 |                     | 99                  |                    | 5.1                    |                        | 9              |            |                | 5              |
| <b>Vibrio owensii</b>           | <b>051011B</b>      | <b>SAMD00019129</b> | <b>PRJNA429421</b> | <b>GCA_002887655.1</b> | <b>Complete Genome</b> | <b>6.26138</b> | <b>-</b>   | <b>86.9108</b> | <b>97.0643</b> |
| <b>Vibrio owensii</b>           | <b>051011B</b>      | <b>SAMD00019129</b> | <b>PRJDB3039</b>   | <b>GCA_000829635.1</b> | <b>Scaffold</b>        | <b>6.06628</b> | <b>133</b> | <b>86.8501</b> | <b>97.0881</b> |
| <b>Vibrio owensii</b>           | <b>47666-1</b>      | <b>SAMD00019139</b> | <b>PRJDB3039</b>   | <b>GCA_000818255.1</b> | <b>Contig</b>          | <b>5.87115</b> | <b>233</b> | <b>86.849</b>  | <b>96.7538</b> |
| <b>Vibrio owensii 47666-1</b>   | <b>47666-1</b>      | <b>SAMN02946480</b> | <b>PRJNA207882</b> | <b>GCA_000817825.1</b> | <b>Contig</b>          | <b>5.83372</b> | <b>55</b>  | <b>86.7738</b> | <b>96.7529</b> |
| <b>Vibrio owensii</b>           | <b>bablab_jr002</b> | <b>SAMN15545052</b> | <b>PRJNA646503</b> | <b>GCA_016464265.1</b> | <b>Contig</b>          | <b>6.26993</b> | <b>250</b> | <b>86.6419</b> | <b>96.7386</b> |
| <b>Vibrio owensii LMG 25430</b> | <b>LMG 25430</b>    | <b>SAMD00036658</b> | <b>PRJDB725</b>    | <b>GCA_000400325.1</b> | <b>Scaffold</b>        | <b>5.82496</b> | <b>341</b> | <b>86.4464</b> | <b>96.6788</b> |
| <b>Vibrio owensii</b>           | <b>V180403</b>      | <b>SAMN09878769</b> | <b>PRJNA487170</b> | <b>GCA_003691545.1</b> | <b>Complete Genome</b> | <b>6.41856</b> | <b>-</b>   | <b>86.3545</b> | <b>97.0816</b> |
| <b>Vibrio owensii</b>           | <b>SH14</b>         | <b>SAMN04128477</b> | <b>PRJNA297683</b> | <b>GCA_001310575.2</b> | <b>Complete Genome</b> | <b>6.26821</b> | <b>-</b>   | <b>85.1883</b> | <b>96.995</b>  |
| <b>Vibrio owensii</b>           | <b>bablab_jr009</b> | <b>SAMN15545059</b> | <b>PRJNA646503</b> | <b>GCA_016464115.1</b> | <b>Contig</b>          | <b>6.19774</b> | <b>207</b> | <b>85.1873</b> | <b>96.8454</b> |

|                                                     |                                  |                     |                         |                             |                            |                     |            |                |                     |
|-----------------------------------------------------|----------------------------------|---------------------|-------------------------|-----------------------------|----------------------------|---------------------|------------|----------------|---------------------|
| <b>Vibrio owensii</b>                               | <b>1700302</b>                   | <b>SAMN09874178</b> | <b>PRJNA4871<br/>43</b> | <b>GCA_00369150<br/>5.1</b> | <b>Complete<br/>Genome</b> | <b>6.4243<br/>1</b> | <b>-</b>   | <b>84.1206</b> | <b>97.000<br/>9</b> |
| <b>Vibrio owensii<br/>CAIM 1854 =<br/>LMG 25443</b> | <b>DY05</b>                      | <b>SAMN02946409</b> | <b>PRJNA1896<br/>97</b> | <b>GCA_00081781<br/>5.1</b> | <b>Scaffold</b>            | <b>6.3453<br/>8</b> | <b>119</b> | <b>80.7687</b> | <b>96.833<br/>6</b> |
| <b>Vibrio owensii<br/>CAIM 1854 =<br/>LMG 25443</b> | <b>CAIM 1854 =<br/>LMG 25443</b> | <b>SAMD00036661</b> | <b>PRJDB728</b>         | <b>GCA_00040038<br/>5.1</b> | <b>Contig</b>              | <b>6.3668<br/>6</b> | <b>451</b> | <b>80.7192</b> | <b>96.843<br/>9</b> |
| <b>Vibrio owensii</b>                               | <b>20160513VC2<br/>W</b>         | <b>SAMN09536720</b> | <b>PRJNA4793<br/>98</b> | <b>GCA_01345983<br/>5.1</b> | <b>Complete<br/>Genome</b> | <b>7.2520<br/>4</b> | <b>-</b>   | <b>78.7005</b> | <b>97.035<br/>1</b> |
| <b>Vibrio owensii</b>                               | <b>ISF-69-8</b>                  | <b>SAMN28767316</b> | <b>PRJNA8437<br/>23</b> | <b>GCA_02474615<br/>5.1</b> | <b>Contig</b>              | <b>6.0302<br/>4</b> | <b>67</b>  | <b>-</b>       | <b>-</b>            |

**Supplementary Table S2 Biochemical analysis of *Vibrio owensii* GRA50-12 using API20E.**

| <b>TESTS</b> | <b>SUBSTRATE</b>            | <b>REACTION TESTED</b>             | <b>-RESULTS</b>                  | <b>+RESULTS</b>              |
|--------------|-----------------------------|------------------------------------|----------------------------------|------------------------------|
| <b>ONPG</b>  | <b>ONPG</b>                 | <b>Beta-galactosidase</b>          | <b>Colorless</b>                 | <b>Yellow (+)</b>            |
| <b>ADH</b>   | <b>Arginine</b>             | <b>Arginine dihydrolase</b>        | <b>Yellow (-)</b>                | <b>Red/orange</b>            |
| <b>LDC</b>   | <b>Lysine</b>               | <b>Lysine decarboxylase</b>        | <b>Yellow</b>                    | <b>Red/orange (+)</b>        |
| <b>ODC</b>   | <b>Ornithine</b>            | <b>Ornithine<br/>decarboxylase</b> | <b>Yellow</b>                    | <b>Red/orange (+)</b>        |
| <b>CIT</b>   | <b>Citrate</b>              | <b>Citrate utilization</b>         | <b>Pale (-)<br/>green/yellow</b> | <b>Blue-green/blue</b>       |
| <b>H2S</b>   | <b>Na thiosulfate</b>       | <b>H2S production</b>              | <b>Colorless/grey (-)</b>        | <b>Black deposit</b>         |
| <b>URE</b>   | <b>Urea</b>                 | <b>Urea hydrolysis</b>             | <b>Yellow (-)</b>                | <b>Red/orange</b>            |
| <b>TDA</b>   | <b>Tryptophan</b>           | <b>Deaminase</b>                   | <b>Yellow(-)</b>                 | <b>Brown-red</b>             |
| <b>IND</b>   | <b>Tryptophan</b>           | <b>Indole production</b>           | <b>Yellow</b>                    | <b>Rdn(2min.) (+)</b>        |
| <b>VP</b>    | <b>Na pyruvate</b>          | <b>Acetoin production</b>          | <b>Colorless (-)</b>             | <b>Pink/red(10<br/>min.)</b> |
| <b>GEL</b>   | <b>Charcoal<br/>gelatin</b> | <b>Gelatinase</b>                  | <b>No diffusion of<br/>black</b> | <b>Black diffuse (+)</b>     |
| <b>GLU</b>   | <b>Glucose</b>              | <b>Fermentation/oxidation</b>      | <b>Blue/blue-green</b>           | <b>Yellow (+)</b>            |

|            |                  |                               |                            |                   |
|------------|------------------|-------------------------------|----------------------------|-------------------|
| <b>MAN</b> | <b>Mannitol</b>  | <b>Fermentation/oxidation</b> | <b>Blue/blue-green</b>     | <b>Yellow (+)</b> |
| <b>INO</b> | <b>Inositol</b>  | <b>Fermentation/oxidation</b> | <b>Blue/blue-green (-)</b> | <b>Yellow</b>     |
| <b>SOR</b> | <b>Sorbitol</b>  | <b>Fermentation/oxidation</b> | <b>Blue/blue-green (-)</b> | <b>Yellow</b>     |
| <b>RHA</b> | <b>Rhamnose</b>  | <b>Fermentation/oxidation</b> | <b>Blue/blue-green (-)</b> | <b>Yellow</b>     |
| <b>SAC</b> | <b>Sucrose</b>   | <b>Fermentation/oxidation</b> | <b>Blue/blue-green</b>     | <b>Yellow (+)</b> |
| <b>MEL</b> | <b>Melibiose</b> | <b>Fermentation/oxidation</b> | <b>Blue/blue-green (-)</b> | <b>Yellow</b>     |
| <b>AMY</b> | <b>Amygdalin</b> | <b>Fermentation/oxidation</b> | <b>Blue/blue-green</b>     | <b>Yellow (+)</b> |
| <b>ARA</b> | <b>Arabionse</b> | <b>Fermentation/oxidation</b> | <b>Blue/blue-green (-)</b> | <b>Yellow</b>     |
| <b>OX</b>  | <b>oxidase</b>   | <b>oxidase</b>                | <b>Colorless/yellow</b>    | <b>Violet (+)</b> |

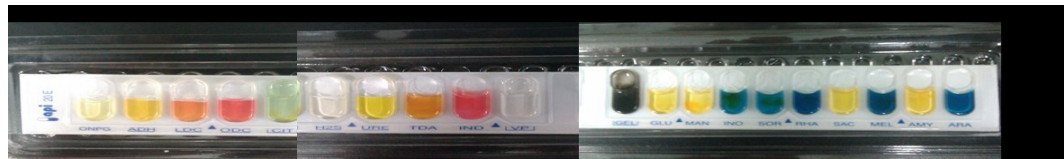

The result of A-/L+/O+ represents arginine dihydrolase (A)-negative, lysine decarboxylase (L)-positive, and ornithine decarboxylase (O)-positive. It is a typical reaction for bacteria in the Harveyi clade, which do not use citrate as a carbon source, but are able to produce acid from amygdalin.

**Supplementary Table S3. Functional annotation of the genome of phi50-12**

| <i>orf</i> | Start | Stop | Length<br>(aa) | Identity     | Accession      | Related protein                                    | Protein product                              |
|------------|-------|------|----------------|--------------|----------------|----------------------------------------------------|----------------------------------------------|
| 01         | 329   | 631  | 100            | 87/97(90%)   | YP_009009731.1 | hypothetical protein<br>(Vibrio phage PVA1)        | hypothetical<br>protein                      |
| 02         | 747   | 1421 | 224            | 100/230(43%) | YP_010089861.1 | hypothetical protein<br>(Vibrio phage pVco-5)      | hypothetical<br>protein                      |
| 03         | 1414  | 2988 | 524            | 334/523(64%) | YP_010089985.1 | terminase large subunit<br>(Vibrio phage pVco-5)   | terminase large<br>subunit                   |
| 04         | 2996  | 3637 | 213            | 98/228(43%)  | YP_009874368.1 | hypothetical protein<br>(Vibrio phage VCO139)      | hypothetical<br>protein                      |
| 05         | 3634  | 6426 | 930            | 261/627(42%) | WP_142740706.1 | hypothetical protein<br>( <i>Vibrio cholerae</i> ) | hypothetical<br>protein/pectin lyase<br>fold |
| 06         | 6426  | 6599 | 57             | -            |                | No similarity                                      | hypothetical<br>protein                      |
| 07         | 6690  | 8849 | 719            | 281/503(56%) | AUS02987.1     | hypothetical protein<br>(Vibrio phage              | hypothetical<br>protein/Phage T7             |

|    |       |       |     |              |                | 2.275.O._10N.286.54.E11) tail fiber protein;<br>pfam03906                                       |                         |
|----|-------|-------|-----|--------------|----------------|-------------------------------------------------------------------------------------------------|-------------------------|
| 08 | 8861  | 9109  | 82  | 38/80(48%)   | WP_102351169.1 | hypothetical protein<br>( <i>Vibrio cyclitrophicus</i> )                                        | hypothetical<br>protein |
| 09 | 9143  | 9526  | 127 | -            |                | No similarity                                                                                   | hypothetical<br>protein |
| 10 | 9604  | 11658 | 684 | 338/689(49%) | YP_009874364.1 | portal protein (Vibrio<br>phage VCO139)                                                         | portal protein          |
| 11 | 11664 | 12005 | 113 | -            |                | No similarity                                                                                   | hypothetical<br>protein |
| 12 | 12012 | 13043 | 363 | 100/287(35%) | DAE92006.1     | TPA: MAG TPA:<br>hypothetical protein<br>( <i>Podoviridae</i> sp. ctXdu7)                       | hypothetical<br>protein |
| 13 | 13054 | 14286 | 410 | 212/383(55%) | WP_126055512.1 | N4-gp56 family major<br>capsid protein<br>( <i>Mesorhizobium</i> sp.<br>M4B.F.Ca.ET.058.02.1.1) | major capsid<br>protein |
| 14 | 14298 | 14945 | 215 | 58/117(50%)  | MBP93671.1     | hypothetical protein<br>(Flavobacteriaceae<br>bacterium)                                        | hypothetical<br>protein |
| 15 | 14945 | 15454 | 169 | 56/142(39%)  | YP_009198596.1 | hypothetical protein<br>(Vibrio phage phi 1)                                                    | hypothetical<br>protein |



|    |       |       |      |               |                |                                                                |                                                |
|----|-------|-------|------|---------------|----------------|----------------------------------------------------------------|------------------------------------------------|
| 16 | 15524 | 17569 | 681  | 242/709(34%)  | YP_008126819.1 | hypothetical protein<br>(Vibrio phage JA-1)                    | hypothetical<br>protein/N4 gp53                |
| 17 | 17556 | 17978 | 140  | 36/64(56%)    | WP_102396907.1 | hypothetical protein<br>( <i>Enterovibrio norvegicus</i> )     | hypothetical<br>protein/N4 gp52                |
| 18 | 17980 | 19173 | 397  | 67/210(32%)   | YP_010089973.1 | hypothetical protein<br>(Vibrio phage pVco-5)                  | hypothetical<br>protein<br>virion-encapsulated |
| 19 | 19185 | 28259 | 3024 | 934/3126(30%) | YP_009874355.1 | virion-encapsulated RNA<br>polymerase (Vibrio phage<br>VCO139) | RNA<br>polymerase/N4<br>gp50                   |
| 20 | 28281 | 28601 | 106  | -             |                | No similarity                                                  | hypothetical<br>protein                        |
| 21 | 28594 | 28914 | 106  | -             |                | No similarity                                                  | hypothetical<br>protein                        |
| 22 | 28915 | 29253 | 112  | -             |                | No similarity                                                  | hypothetical<br>protein                        |
| 23 | 29264 | 29455 | 63   | -             |                | No similarity                                                  | hypothetical<br>protein                        |
| 24 | 29452 | 29667 | 71   | 48/65(74%)    | QMP81715.1     | hypothetical protein<br>(Vibrio phage XM1)                     | hypothetical<br>protein                        |

|    |       |       |     |              |                |                                                                |                                                      |
|----|-------|-------|-----|--------------|----------------|----------------------------------------------------------------|------------------------------------------------------|
| 25 | 29668 | 29841 | 57  | -            |                | No similarity                                                  | hypothetical protein                                 |
| 26 | 29903 | 30436 | 199 | -            |                | No similarity                                                  | hypothetical protein                                 |
| 27 | 30429 | 30752 | 107 | 35/96(36%)   | NIV12308.1     | hypothetical protein ( <i>Aliifodinibius</i> sp.)              | hypothetical protein                                 |
| 28 | 30770 | 31201 | 143 | 86/139(62%)  | WP_034876896.1 | hypothetical protein ( <i>Endozoicomonas montiporae</i> )      | hypothetical protein                                 |
| 29 | 31204 | 31587 | 127 | 88/125(70%)  | MBR9878665.1   | Holliday junction endonuclease (Gammaproteobacteria bacterium) | hypothetical protein/ Holliday junction endonuclease |
| 30 | 31662 | 32384 | 240 | 78/247(32%)  | RLC98789.1     | hypothetical protein (Chloroflexi bacterium)                   | hypothetical protein                                 |
| 31 | 32442 | 33194 | 250 | 124/250(50%) | YP_009198587.1 | AAA domain protein (Vibrio phage phi 1)                        | hypothetical protein/AAA domain protein              |
| 32 | 33237 | 35411 | 74  | 397/719(55%) | YP_010089961.1 | hypothetical protein (Vibrio phage pVco-5)                     | hypothetical protein/ N4 gp43/ primase               |

|    |       |       |     |              |                |                                                                        |                               |
|----|-------|-------|-----|--------------|----------------|------------------------------------------------------------------------|-------------------------------|
| 33 | 35411 | 35641 | 76  | -            |                | No similarity                                                          | hypothetical protein          |
| 34 | 35648 | 36655 | 335 | 161/335(48%) | YP_010089960.1 | hypothetical protein (Vibrio phage pVco-5)                             | hypothetical protein/ N4 gp42 |
| 35 | 36808 | 37323 | 171 | 61/162(38%)  | YP_009914108.1 | hypothetical protein ( <i>Pseudomonas</i> phage Epa13)                 | hypothetical protein          |
| 36 | 37434 | 38231 | 265 | 59/186(32%)  | MBL4909043.1   | ParB N-terminal domain-containing protein (Alteromonadaceae bacterium) | hypothetical protein          |
| 37 | 38222 | 38827 | 201 | 117/196(60%) | MBL4623368.1   | hypothetical protein (Immundisolibacteraceae bacterium)                | hypothetical protein          |
| 38 | 38834 | 39166 | 110 | -            |                | No similarity                                                          | hypothetical protein          |
| 39 | 39163 | 39360 | 65  | 29/64(45%)   | YP_010093499.1 | hypothetical protein (Vibrio phage 1.245.O._10N.261.54.C7)             | hypothetical protein          |
| 40 | 39364 | 39609 | 81  | 29/79(37%)   | WP_045035730.1 | hypothetical protein ( <i>Photobacterium iliopiscarium</i> )           | hypothetical protein          |

|    |       |       |     |              |                |                                                              |                       |
|----|-------|-------|-----|--------------|----------------|--------------------------------------------------------------|-----------------------|
| 41 | 39732 | 39992 | 86  | -            |                | No similarity                                                | hypothetical protein  |
| 42 | 40004 | 40252 | 82  | -            |                | No similarity                                                | hypothetical protein  |
| 43 | 40256 | 40615 | 119 | 49/109(45%)  | APC44391.1     | hypothetical protein ( <i>Pseudoalteromonas</i> phage PH357) | hypothetical protein  |
| 44 | 40619 | 43243 | 874 | 446/841(53%) | YP_010089956.1 | DNA polymerase (Vibrio phage pVco-5)                         | DNA polymerase        |
| 45 | 43243 | 43503 | 86  | -            |                | No similarity                                                | hypothetical protein  |
| 46 | 43496 | 43750 | 84  | -            |                | No similarity                                                | hypothetical protein  |
| 47 | 43743 | 44000 | 85  | -            |                | No similarity                                                | hypothetical protein  |
| 48 | 43993 | 44448 | 151 | -            |                | No similarity                                                | hypothetical protein  |
| 49 | 44429 | 44680 | 83  | -            |                | No similarity                                                | hypothetical protein  |
| 50 | 44677 | 45837 | 386 | 121/392(31%) | YP_010089954.1 | hypothetical protein (Vibrio phage pVco-5)                   | hypothetical protein  |
| 51 | 45932 | 47137 | 401 | 153/409(37%) | YP_008126799.1 | metallopeptidase domain protein (Vibrio phage                | hypothetical protein/ |

|    |       |       |     |              | JA-1)          | metallopeptidase domain protein                                        |                      |
|----|-------|-------|-----|--------------|----------------|------------------------------------------------------------------------|----------------------|
| 52 | 47185 | 48354 | 389 | 109/273(40%) | YP_009198571.1 | hypothetical protein (Vibrio phage phi 1)                              | hypothetical protein |
| 53 | 48416 | 48820 | 134 | 46/118(39%)  | YP_010089942.1 | hypothetical protein (Vibrio phage pVco-5)                             | hypothetical protein |
| 54 | 48834 | 49469 | 211 | 76/124(61%)  | SCM71617.1     | conserved hypothetical protein (uncultured <i>Pleomorphomonas</i> sp.) | hypothetical protein |
| 55 | 49466 | 49630 | 54  | -            |                | No similarity                                                          | hypothetical protein |
| 56 | 49630 | 49917 | 95  | 49/93(53%)   | AUR89987.1     | hypothetical protein (Vibrio phage 1.135.O._10N.222.54.B6)             | hypothetical protein |
| 57 | 49914 | 50267 | 117 | -            |                | No similarity                                                          | hypothetical protein |
| 58 | 50274 | 51086 | 270 | 164/268(61%) | YP_008239443.1 | hypothetical protein ( <i>Salmonella</i> phage FSL SP-058)             | hypothetical protein |
| 59 | 51083 | 51667 | 194 | 108/185(58%) | QUE30147.1     | hypothetical protein (Vibrio phage vB_ValP_IME234)                     | hypothetical protein |

|    |       |       |     |             |                |                                                                      |                                 |
|----|-------|-------|-----|-------------|----------------|----------------------------------------------------------------------|---------------------------------|
| 60 | 51679 | 51924 | 81  | -           |                | No similarity                                                        | hypothetical protein            |
| 61 | 52070 | 52402 | 110 | -           |                | No similarity                                                        | hypothetical protein            |
| 62 | 52405 | 54075 | 556 | -           |                | No similarity                                                        | hypothetical protein            |
| 63 | 54114 | 54341 | 75  | -           |                | No similarity                                                        | hypothetical protein            |
| 64 | 54345 | 54692 | 115 | 21/47(45%)  | MBO5293219.1   | transcription repressor NadR (Lachnospiraceae bacterium)             | hypothetical protein            |
| 65 | 55019 | 55681 | 220 | 48/100(48%) | WP_180912452.1 | MULTISPECIES:<br>hypothetical protein ( <i>Vibrio harveyi</i> group) | hypothetical protein            |
| 66 | 55732 | 55974 | 80  | 33/68(49%)  | WP_059010108.1 | hypothetical protein (Type-C symbiont of <i>Plautia stali</i> )      | hypothetical protein            |
| 67 | 56140 | 56268 | 42  | -           |                | No similarity                                                        | hypothetical protein            |
| 68 | 56284 | 56823 | 179 | -           |                | No similarity                                                        | hypothetical protein            |
| 69 | 56862 | 57353 | 163 | 81/147(55%) | WP_112404091.1 | glycoside hydrolase family protein ( <i>Vibrio</i>                   | baseplate central spike complex |

|    |       |       |     |             |              |                                                                |                      |
|----|-------|-------|-----|-------------|--------------|----------------------------------------------------------------|----------------------|
|    |       |       |     |             |              | <i>diazotrophicus</i> )                                        | protein              |
| 70 | 57357 | 57743 | 128 | 60/127(47%) | CAG22427.1   | hypothetical protein<br>( <i>Photobacterium profundum</i> SS9) | hypothetical protein |
| 71 | 57736 | 58032 | 98  | -           |              | No similarity                                                  | hypothetical protein |
| 72 | 58004 | 58303 | 99  | -           |              | No similarity                                                  | hypothetical protein |
| 73 | 58290 | 58514 | 74  | -           |              | No similarity                                                  | hypothetical protein |
| 74 | 58501 | 58761 | 86  | -           |              | No similarity                                                  | hypothetical protein |
| 75 | 58733 | 58999 | 88  | -           |              | No similarity                                                  | hypothetical protein |
| 76 | 58962 | 59255 | 97  | -           |              | No similarity                                                  | hypothetical protein |
| 77 | 59248 | 59526 | 92  | 66/91(73%)  | MBP7662271.1 | hypothetical protein<br>( <i>Shewanella</i> sp.)               | hypothetical protein |
| 78 | 59513 | 59755 | 80  | -           |              | No similarity                                                  | hypothetical protein |
| 79 | 59752 | 59985 | 77  | -           |              | No similarity                                                  | hypothetical protein |

|    |       |       |     |              |                |                                                         |                             |
|----|-------|-------|-----|--------------|----------------|---------------------------------------------------------|-----------------------------|
| 80 | 59988 | 60197 | 69  | -            |                | No similarity                                           | hypothetical protein        |
| 81 | 60197 | 60430 | 77  | -            |                | No similarity                                           | hypothetical protein        |
| 82 | 60430 | 60666 | 78  | -            |                | No similarity                                           | hypothetical protein        |
| 83 | 60666 | 60881 | 71  | -            |                | No similarity                                           | hypothetical protein        |
| 84 | 60949 | 62160 | 403 | 173/407(43%) | YP_009874314.1 | DNA-directed RNA polymerase RNAP2 (Vibrio phage VCO139) | DNA-directed RNA polymerase |
| 85 | 62182 | 62376 | 64  | -            |                | No similarity                                           | hypothetical protein        |
| 86 | 62369 | 62566 | 65  | -            |                | No similarity                                           | hypothetical protein        |
| 87 | 62550 | 62768 | 72  | -            |                | No similarity                                           | hypothetical protein        |
| 88 | 62761 | 62955 | 64  | -            |                | No similarity                                           | hypothetical protein        |
| 89 | 62952 | 63920 | 322 | 105/311(34%) | YP_009876321.1 | RNA polymerase (Vibrio phage JSF3)                      | DNA-directed RNA polymerase |
| 90 | 63990 | 64226 | 78  | -            |                | No similarity                                           | hypothetical protein        |



|    |       |       |     |             |            |                                                            |                                                            |
|----|-------|-------|-----|-------------|------------|------------------------------------------------------------|------------------------------------------------------------|
| 91 | 64238 | 64555 | 105 | -           |            | No similarity                                              | hypothetical protein                                       |
| 92 | 64579 | 64839 | 86  | -           |            | No similarity                                              | hypothetical protein                                       |
| 93 | 64936 | 65157 | 73  | -           |            | No similarity                                              | hypothetical protein                                       |
| 94 | 65278 | 65556 | 92  | -           |            | No similarity                                              | hypothetical protein                                       |
| 95 | 65589 | 65954 | 121 | 54/126(43%) | AOQ26695.1 | hypothetical protein (Vibrio phage 2E1)                    | hypothetical protein/PadR family transcriptional regulator |
| 96 | 65947 | 66162 | 71  | -           |            | No similarity                                              | hypothetical protein                                       |
| 97 | 66228 | 66389 | 56  | -           |            | No similarity                                              | hypothetical protein                                       |
| 98 | 66393 | 66854 | 156 | 57/126(45%) | AUR89196.1 | hypothetical protein (Vibrio phage 1.121.O._10N.286.46.C4) | hypothetical protein                                       |
| 99 | 66858 | 67079 | 73  | -           |            | No similarity                                              | hypothetical protein                                       |

|     |       |       |    |   |               |                      |
|-----|-------|-------|----|---|---------------|----------------------|
| 100 | 67093 | 67293 | 66 | - | No similarity | hypothetical protein |
| 101 | 67606 | 67848 | 80 | - | No similarity | hypothetical protein |

---

**(a)**

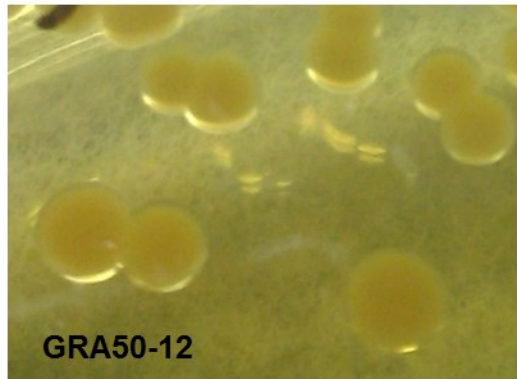

**(b)**

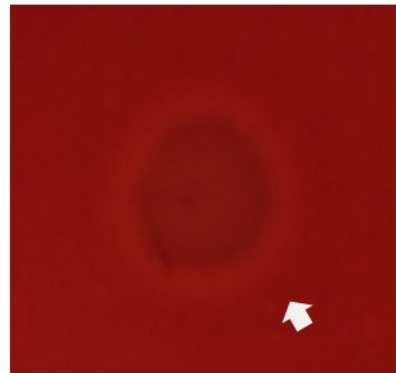

**Supplementary Figure S1. Colony morphology and hemolytic activity of *V. owensii* GRA50-12 in (a) TSB3S and (b) Wagatsuma blood agar plate.**

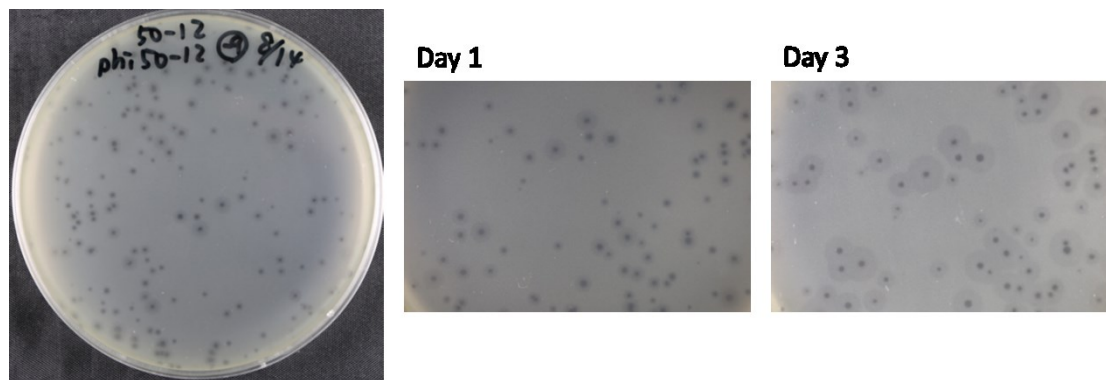

**Supplementary Figure S2. Plaque morphology of phi50-12.**

(A) Plaques of phi50-12 were formed on bacterial lawns of *V. owensii* GRA50-12; halo zones are observed surrounding the clear center of plaques. The halo zone area increased over days. (B) Plaques on the lawns of host cells on Day 1 and Day 3 after plating

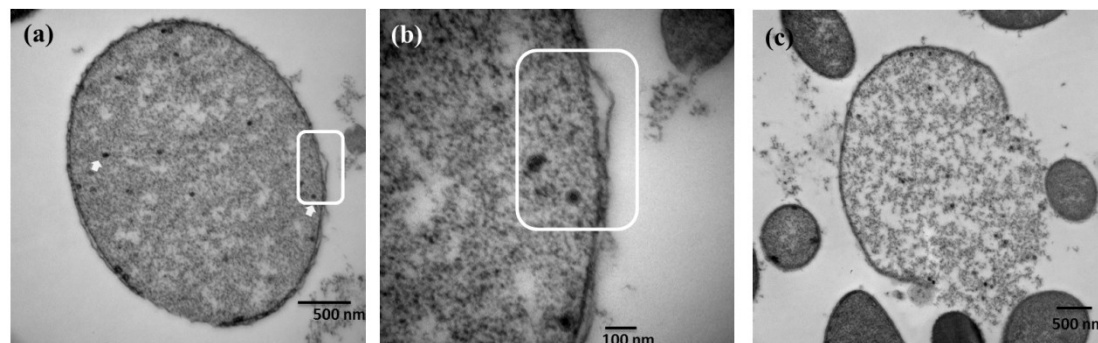

**Supplementary Figure S3. Ultrathin section of transmission electron micrographs of phi50-12 infecting *V. owensii* GRA50-12.**

*V. owensii* GRA50-12 was infected by phi50-12 with MOI=10 for 50 minutes. (A) The locations of virion release on infected cells were observable as a bulge and an irregular surface. (B) The magnification of the white box region of (A). (C) An infected cell blasting out and

releasing mature virions. Scale bars, 100 nm.

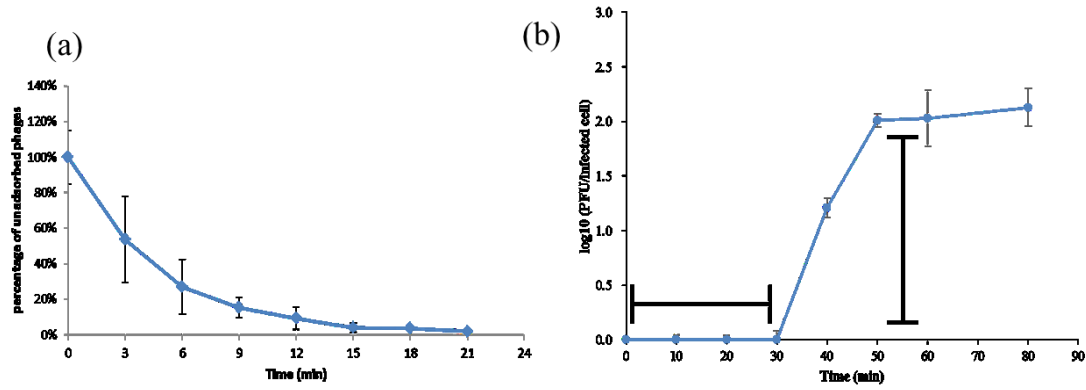

**Supplementary Figure S4. Biological properties of phi50-12 (a)** Phage adsorption curve for phi50-12. **(b)** One-step growth curve with host *V. owensii* GRA50-12 infected at 30 °C. Each point represents the mean of three independent experiments.

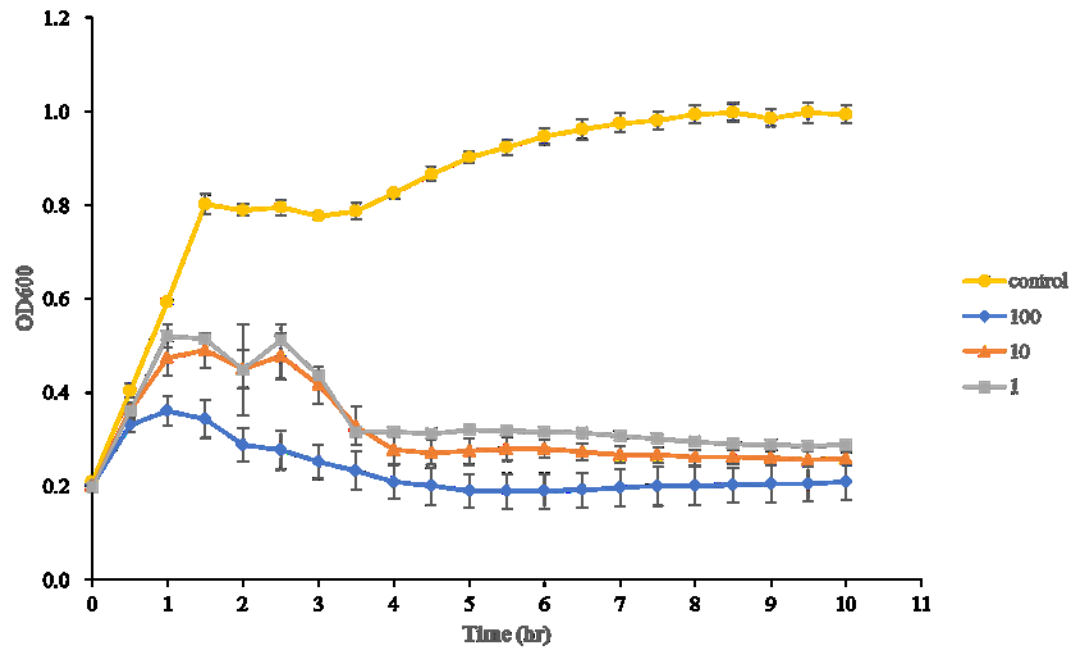

**Supplementary Figure S5. In vitro lysis analysis of phi50-12 against *V. owensii* GRA50-12 at different MOIs.** All values are the mean of triplicate measurements with standard deviation, and two independent experiments were performed.

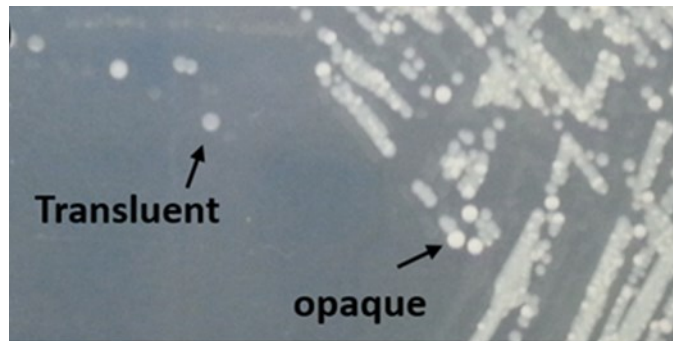

**Opaque type → Translucent type**

**Supplementary Figure S6. Colony morphology changes when *V. owensii* GRA50-12 was challenged with phi50-12.**

*V. owensii* GRA50-12 was growing into mid-log phase and infected with MOI=0.1 MOI of phi50-12, then cultured for 24 hours at 30°C. The overnight cultures were streaked on a TSB3S plate and incubated for 24 h at 30°C. The colony morphology changed from opaque to translucent.

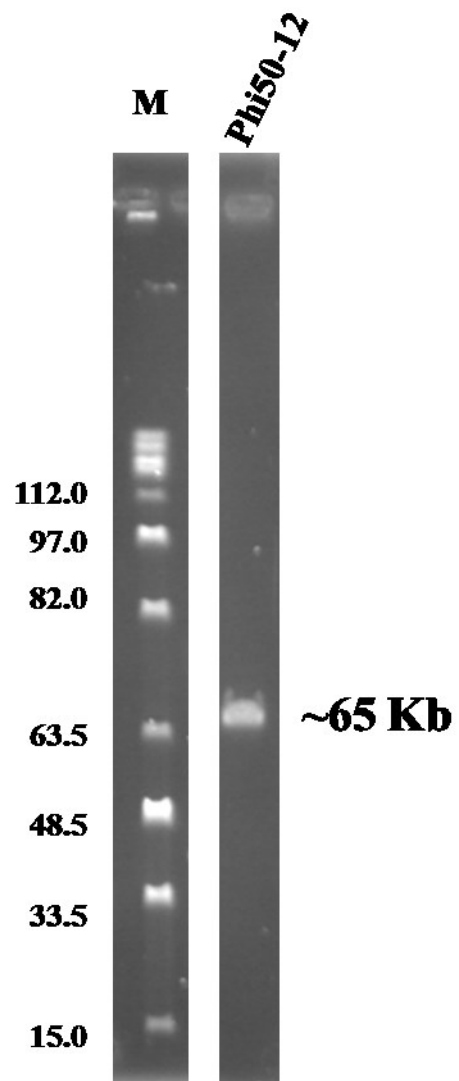

**Supplementary Figure S7. Estimation of the genome size of phi50-12 using pulsed-field gel electrophoresis (PFGE).** Genomic DNA of phi50-12 was isolated and the CHEF-DR III System (Bio-Rad Laboratories, Hercules, CA, USA) was used to estimate the molecular size under the following conditions: 9 °C in 0.5 × Tris-borate-EDTA buffer (pH 8.0) at 6 V/cm with pulse ramps from 3.5 to 4 s for 19.5 h. A Midrange IPFG Marker (New England Biolabs, Ipswich, MA, USA) was used as the molecular size standard. Original gel are presented in Supplementary Figure S10.

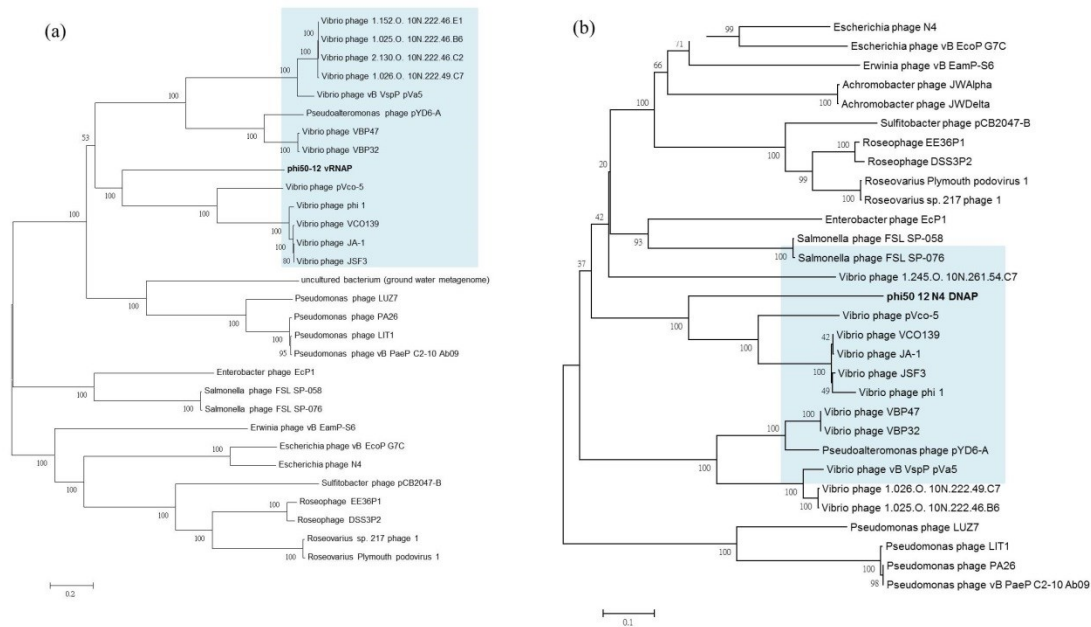

**Supplementary Figure S8. Phylogenetic analysis of virion-associated RNA polymerase (vRNAP)(5A) and DNA polymerase (DNAP) (5B).** The tree was generated using MEGA11 based on the Neighbor-joining method with 1000 bootstraps. This analysis involved all Vibriophages currently available in the reference database.



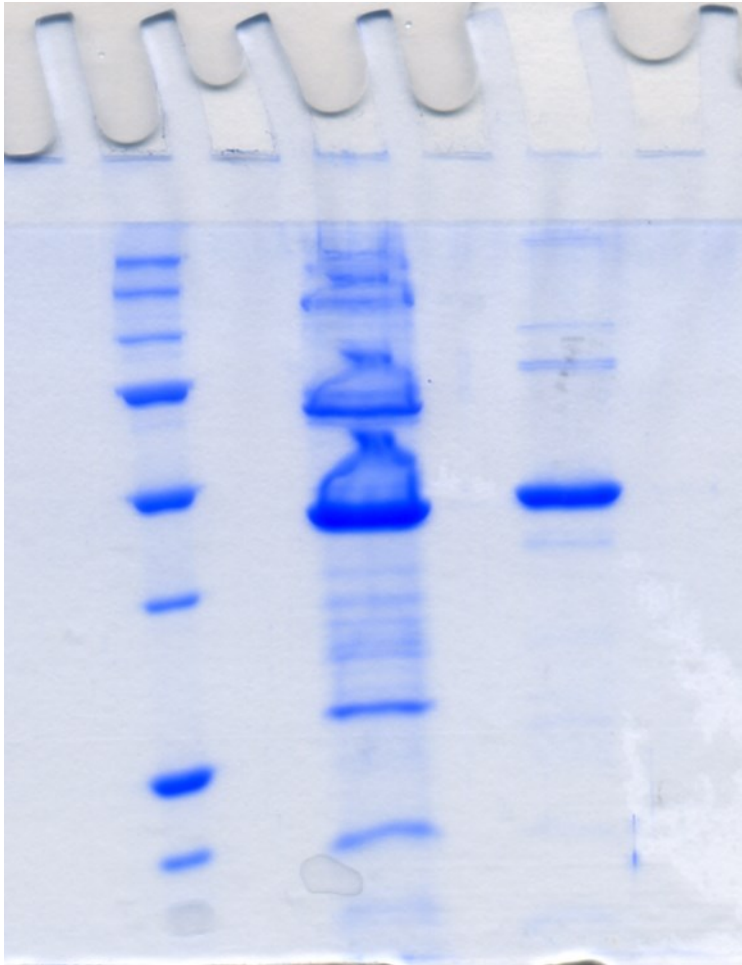

**Supplementary Figure S9. The original gel of Figure 5.**

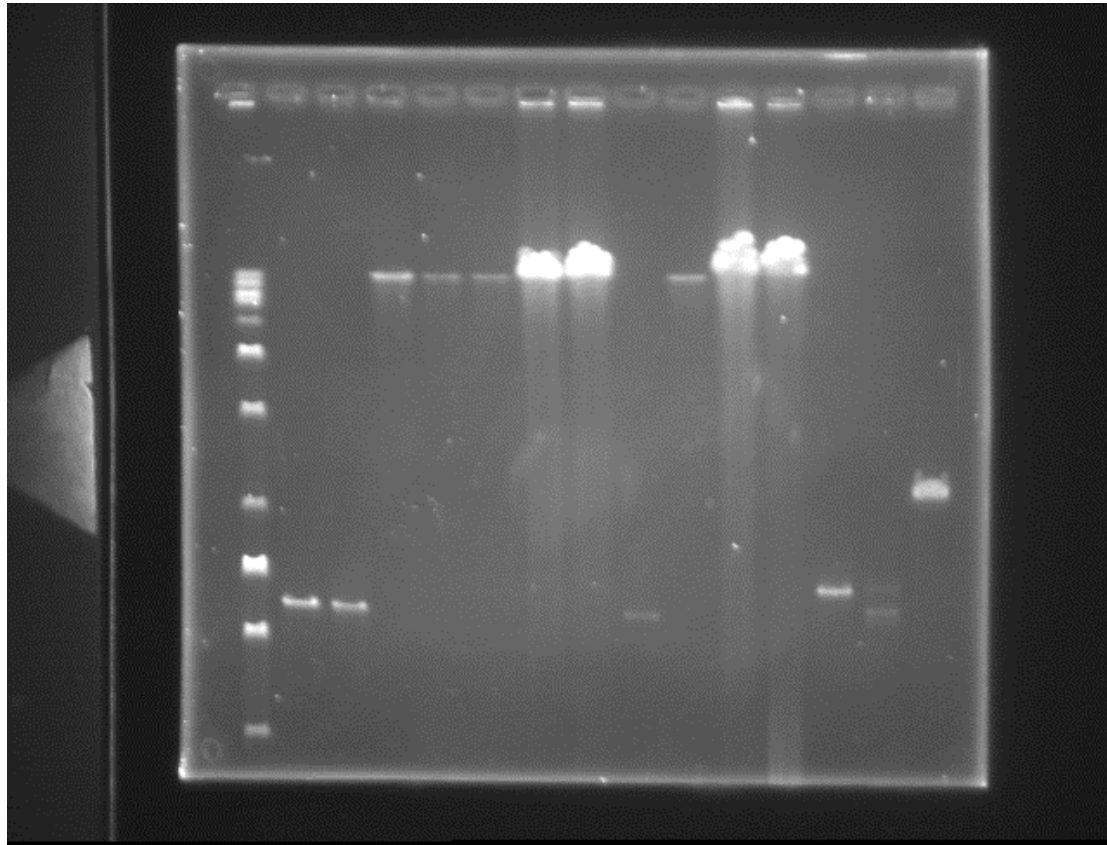

**Supplementary Figure S10. The original gel of Supplementary Figure S7**
